# Supplementary material for: pH-Driven Selective Adsorption of Multi-Dyes Solutions by Loofah Sponge and Polyaniline-Modified Loofah Sponge
Source: MDPI journal article supplement (doi:10.3390/polym14224897), 2022-11-13
Supplement: s1 [file s1]

## Supporting Information

### pH-driven selective adsorption of multi-dyes solutions by loofah sponge and polyaniline-modified loofah sponge

Melissa G. Galloni<sup>1,2</sup>, Veronica Bortolotto<sup>1</sup>, Ermelinda Falletta<sup>1,2\*</sup>, Claudia L. Bianchi<sup>1,2</sup>

<sup>1</sup> Department of Chemistry, University of Milan, Via Golgi 19, 20133 Milan, Italy

<sup>2</sup> Consorzio Interuniversitario Nazionale per la Scienza e Tecnologia dei Materiali (INSTM), Via Giusti 9, 50121, Florence, Italy

\* Correspondence: ermelinda.falletta@unimi.it; Tel.: +39-02-503114410

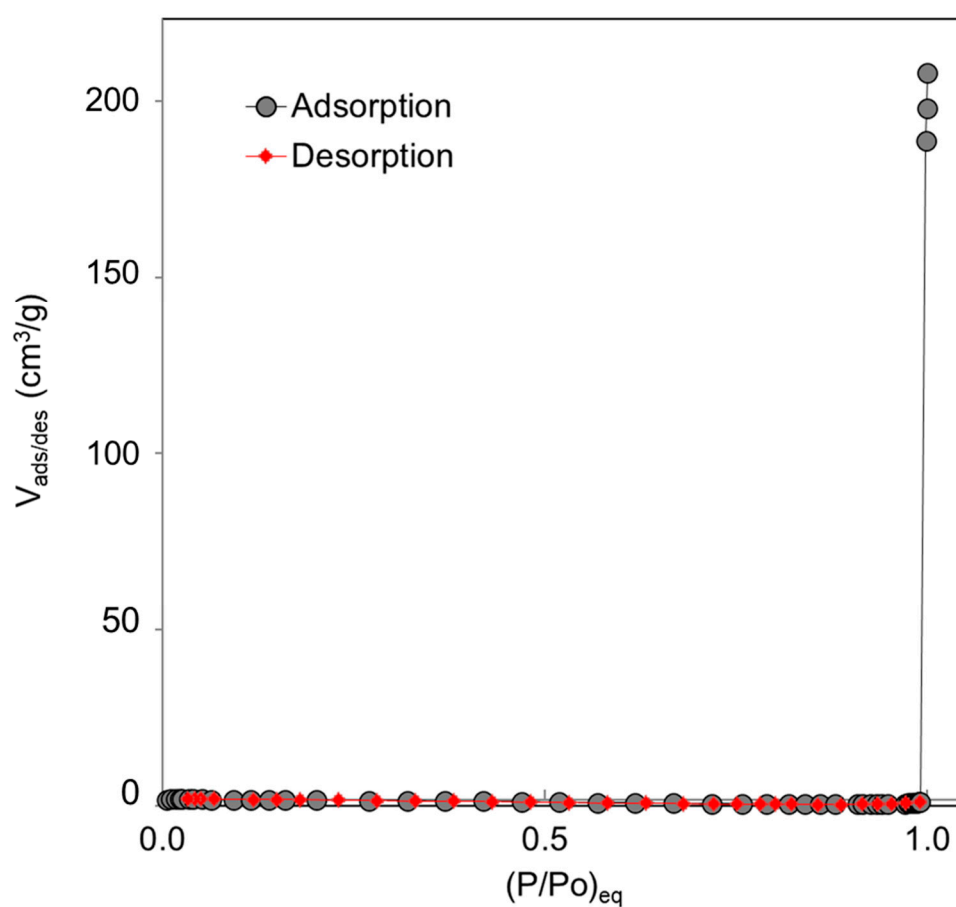

Figure S1. N<sub>2</sub> adsorption/desorption isotherms at -196°C of LS.

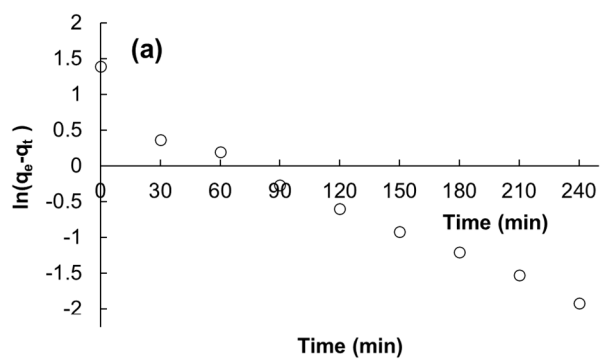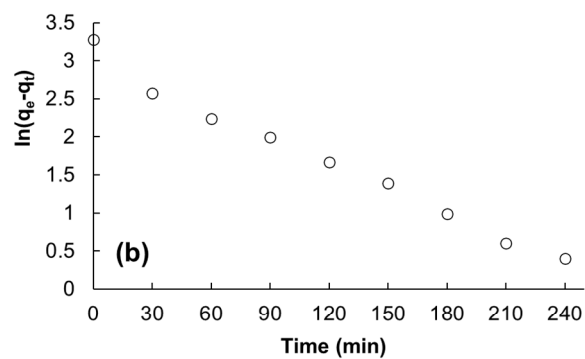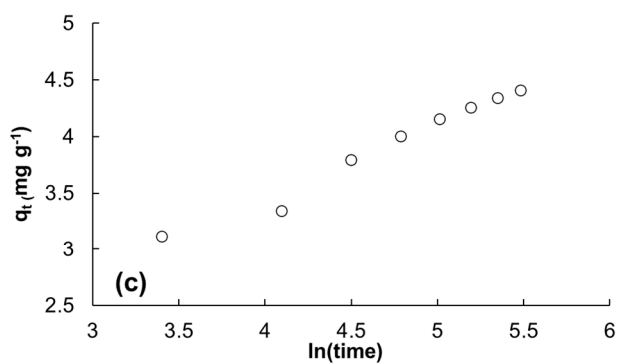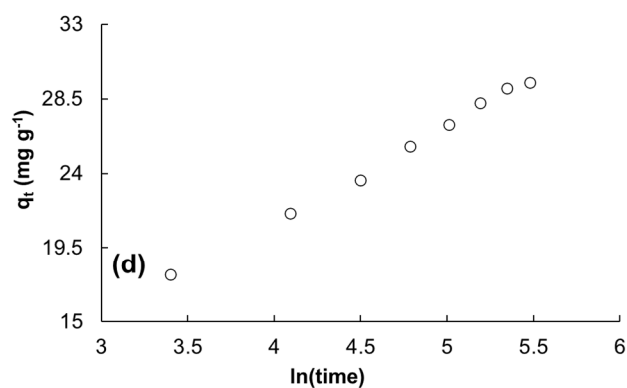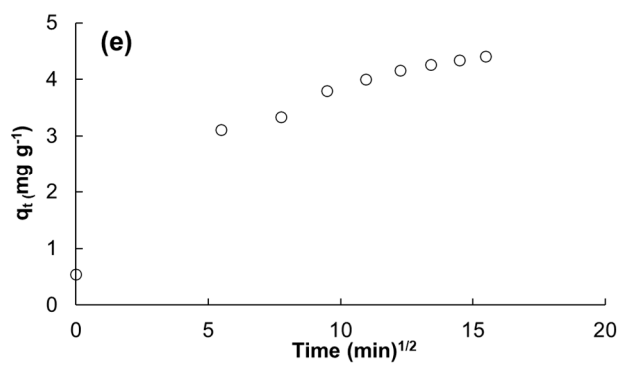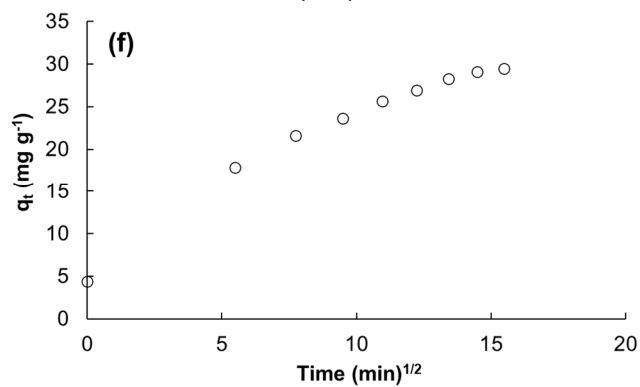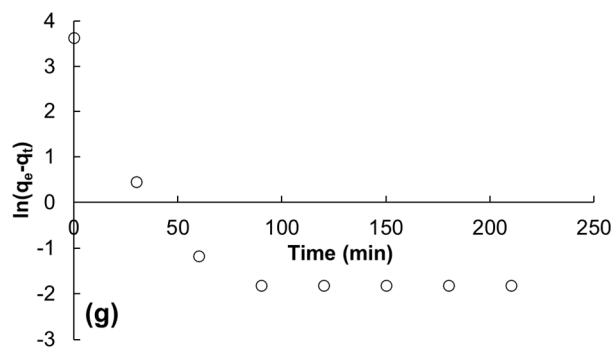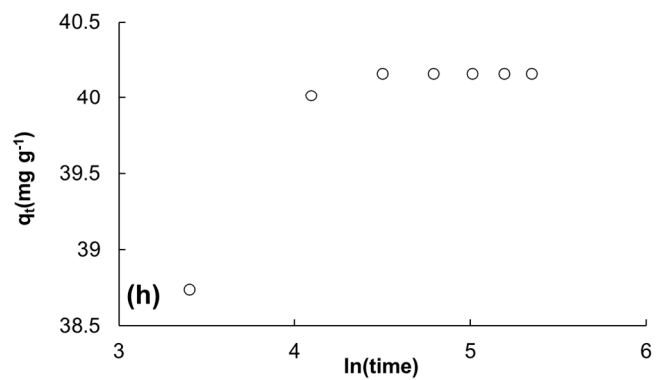

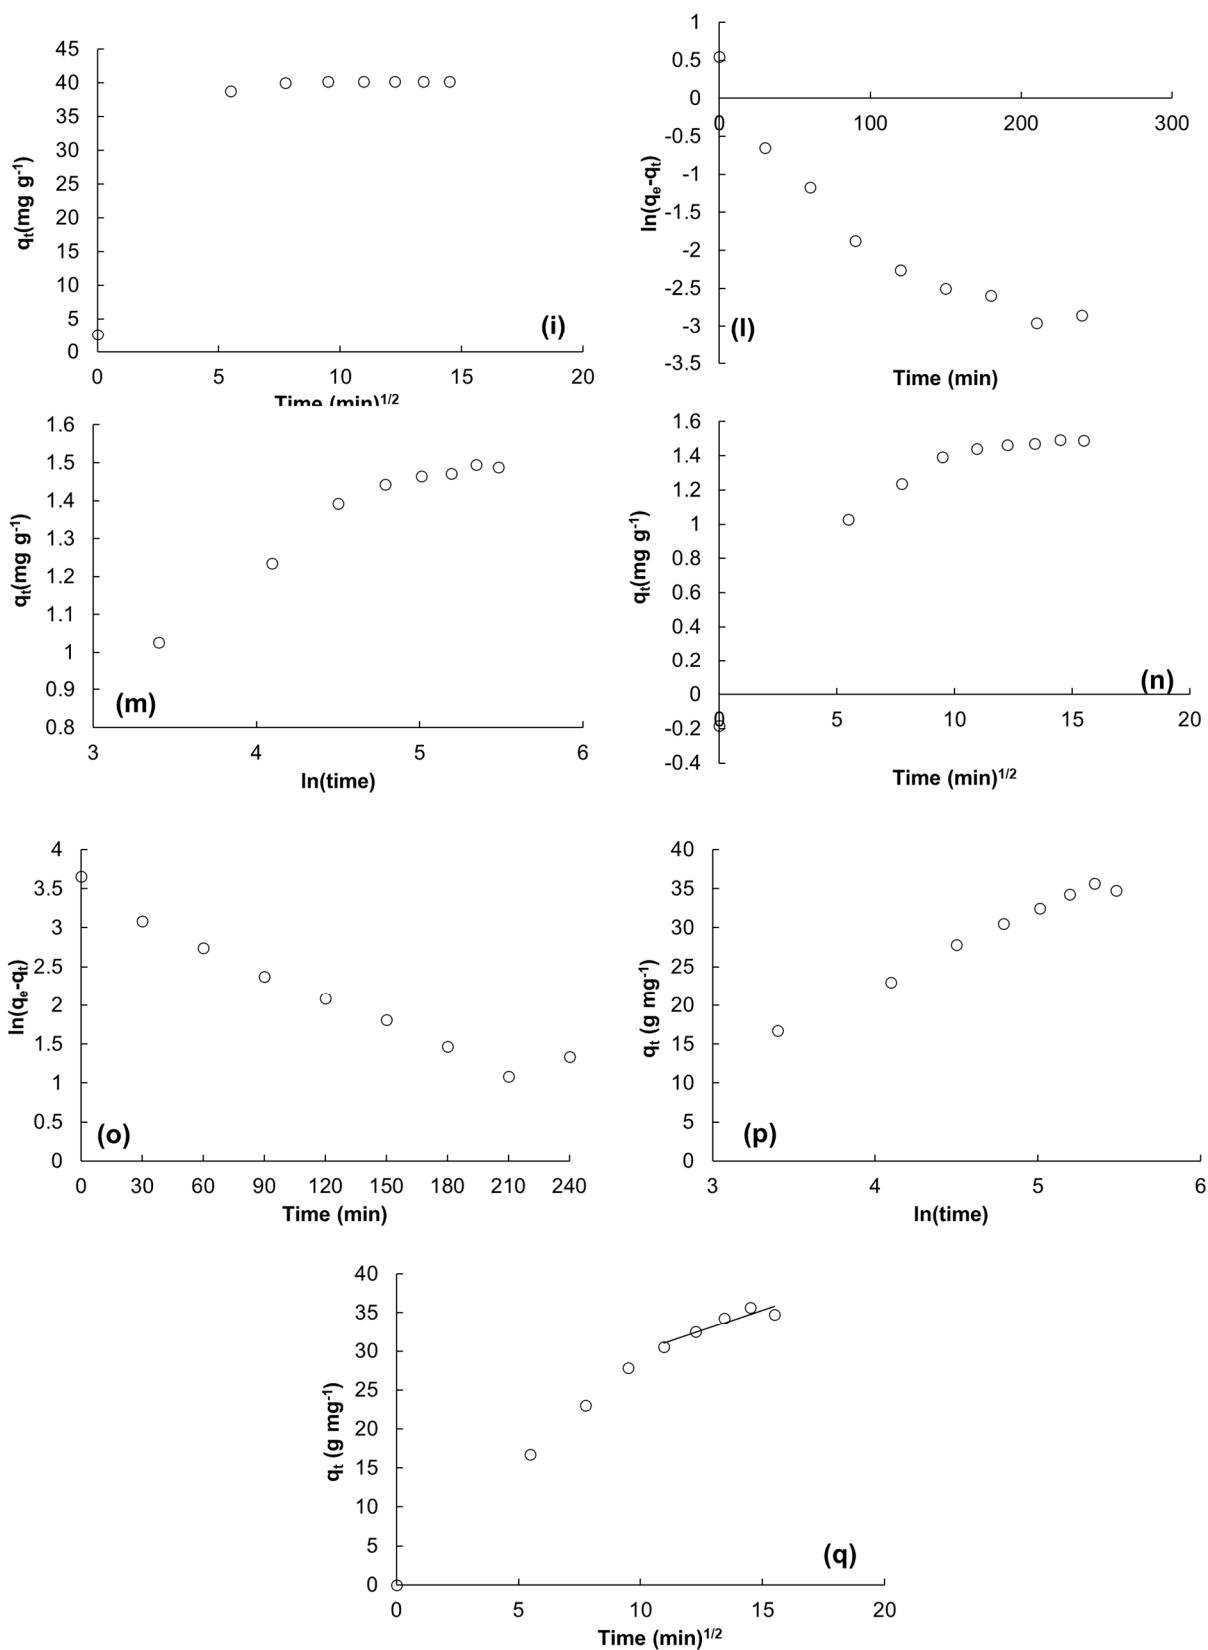

**Figure S2:** Kinetic models for adsorption of dyes by LS and P-LS. RHB [a) pseudo-first order c) Elovich, e) intraparticle diffusion (LS at pH 3); b) pseudo-first order, d) Elovich, f) intraparticle diffusion (P-LS at spontaneous pH)], MO [g) pseudo-first order, h) Elovich, i) intraparticle diffusion (P-LS at spontaneous pH)] and MB [l) pseudo-first order m) Elovich, n) intraparticle diffusion (LS at pH 3); o) pseudo-first order, p) Elovich, q) intraparticle diffusion (P-LS at spontaneous pH)].
